## Myocarditis and arrhythmogenic right ventricular cardiomyopathy: a diagnostic challenge

M. Bergonti<sup>1</sup>, A. Dello Russo<sup>2</sup>, V. Catto<sup>3</sup>, A. Gasperetti<sup>3</sup>, R. Sicuso<sup>3</sup>, G. Vettor<sup>3</sup>, V. Ribatti<sup>3</sup>, F. Tundo<sup>3</sup>, M. Moltrasio<sup>3</sup>, E. Sommariva<sup>4</sup>, D. Andreini<sup>5</sup>, C. Basso<sup>6</sup>, A. Natale<sup>7</sup>, C. Tondo<sup>3</sup>, M. Casella<sup>8</sup>

<sup>1</sup>University of Milan, Cardiovascular sciences, Milan, Italy; <sup>2</sup>Marche Polytechnic University of Ancona, Clinica di Cardiologia e Aritmologia, Dipartimento di Scienze Biomediche e Sanità Pubblica, Ancona, Italy; <sup>3</sup>Monzino Cardiology Center, IRCCS, Heart Rhythm Center, Milan, Italy; <sup>4</sup>Monzino Cardiology Center, IRCCS, Unit of Vascular Biology and Regenerative Medicine, Milan, Italy; <sup>5</sup>Monzino Cardiology Center, IRCCS, Cardiovascular Computed Tomography and Radiology Unit, Milan, Italy; <sup>6</sup>University of Padua, Cardiovascular Pathology Unit, Department of Cardiac, Thoracic, Vascular Sciences and Public Health, Padova, Italy; <sup>7</sup>St. David's Medical Center, Texas Cardiac Arrhythmia Institute, Austin, United States of America; <sup>8</sup>Marche Polytechnic University of Ancona, Department of Clinical, Special and Dental Sciences, Ancona, Italy

**Funding Acknowledgement:** Type of funding source: None

**Background:** Current arrhythmogenic right ventricular cardiomyopathy (ARVC) diagnostic criteria are mostly based on ventricle function and dimension. Previous studies have reported a significant overlap between ARVC and chronic myocarditis, at non-invasive assessment.

**Purpose:** To compare biopsy-proven ARVC and myocarditis patients, in order to identify clinical, imaging and invasive electroanatomic voltage mapping (EVM) differences between the two groups.

**Methods:** Patients with borderline diagnosis of ARVC or suspected myocarditis underwent complete assessment with cardiac magnetic resonance (CMR). All patients underwent endomyocardial biopsy (EMB) with targeted tissue sampling guided by EVM. All patients with a histological diagnosis of myocarditis or ARVC were included.

**Results:** 83 patients were included, divided into 35 (42.2%) ARVC and 48 (57.8%) myocarditis. Among ARVC patients, 25 (71.4%) had right dominant ARVC, 5 (14.3%) left dominant pattern and 5 (14.3%) bi-ventricular involvement. Nine patients (23.1%) with suspected clinical diagnosis of ARVC before EMB, received a histological diagnosis of myocarditis. Two (5.7%) patients with suspected myocarditis were proven to have ARVC. When comparing patients with ARVC and patients with myocarditis, univariate

analysis showed that age, sex, family history, arrhythmic disorders at presentation and ECG abnormalities were similar between the two groups ( $P > 0.05$  for all the variables). There was also no significant difference with regards to bi-ventricular function and dimension at CMR evaluation. More patients with myocarditis resulted positive at late gadolinium enhancement (LGE) evaluation, although non-significantly ( $P = 0.082$ ). Oedema was more frequently present in patients with myocarditis ( $P = 0.01$ ), while adipose tissue infiltration and segmental wall motion abnormalities were more often observed in patients with ARVC ( $P = 0.002$  and  $P < 0.001$  respectively). At EVM analysis, a significant greater number of patients had a pathological uni- and bi-polar EVM ( $P < 0.05$  in all cases) and the scar-area was greater in patients with ARVC: 18.8 vs 11.0 cmq ( $P = 0.041$ ).

**Conclusion(s):** A significant number of patients who received a clinical diagnosis of Myocarditis or ARVC according to current guidelines, were subsequently reclassified after histological analysis. Patients with ARVC and myocarditis were not distinguishable on the basis of clinical features and ventricular function and dimensions. Conversely, tissue analysis with CMR demonstrated how patient with ARVC had less oedema, more adipose tissue infiltration and had more extensive scar at EVM evaluation.
